# Supplementary material for: Deciphering hierarchical organization of topologically associated domains through change-point testing
Source: PubMed Central journal article supplement (PMC8037919; doi:10.1186/s12859-021-04113-8), 2021-04-10
Supplement: 12859_2021_4113_MOESM1_ESM.pdf [file 12859_2021_4113_MOESM1_ESM.pdf]

# Additional file 1: Decipher hierarchical organization of topologically associated domains through change-point testing

Haipeng Xing<sup>\*†</sup>; Yingru Wu<sup>†</sup>; Michael Q. Zhang, Yong Chen<sup>\*</sup>

## 1 Proof of Theorem 1 and 2

### Theorem 1.

Before we prove Theorem 1, let's take a look at Gaussian distribution assumption. Instead of negative binomial we assume:

$$x_{ij} \sim N(\mu_k, \sigma^2), \quad 1 \leq i \leq j \leq n, \quad \mu_k = \begin{cases} \mu_1, & \text{if } (i, j) \in A_{0,1} \\ \mu_2, & \text{if } (i, j) \in A_{1,2} \\ \mu_0, & \text{if } (i, j) \in R_{0,1,2} \end{cases}$$

Without loss of generality we take  $\sigma$  constant in the local region  $A$ , as they can be scaled to be equal. So we have log GLR test statistics:

$$GLR_{G,m} = \frac{1}{2\sigma^2} \left( \frac{S_{A_1}^2}{|A_{0,1}|} + \frac{S_{A_2}^2}{|A_{1,2}|} + \frac{S_R^2}{|R|} - \frac{S_A^2}{|A|} \right)$$

some algebra shows directly that  $GLR_{G,m} = Z_m$ .

Now we come back to negative binomial case.

$$\begin{aligned} GLR_{NB,m} &= \sum_{k=1,2} \left\{ S_{A_k} \log \left( \frac{S_{A_k}/|A_{k-1,k}|}{r + S_{A_k}/|A_{k-1,k}|} \right) \right. \\ &\quad \left. + r|A_{k-1,k}| \log \left( \frac{r}{r + S_{A_k}/|A_{k-1,k}|} \right) \right\} \\ &\quad + \left( S_R \log \left( \frac{S_R/|R|}{r + S_R/|R|} \right) + r|R| \log \left( \frac{r}{r + S_R/|R|} \right) \right) \\ &\quad - \left( S_A \log \left( \frac{S_A/|A|}{r + S_A/|A|} \right) + r|A| \log \left( \frac{r}{r + S_A/|A|} \right) \right) \quad (1.1) \end{aligned}$$

---

<sup>\*</sup>Correspondence: haipeng.xing@stonybrook.edu; chenyon@rowan.edu

<sup>†</sup>Equal contributor

Under null hypothesis, consider  $x_{ij}$  from region  $A$  in 1.1. By central limit theorem we have:

$$S_A/|A| = \frac{\phi r}{1-\phi} + O_p(|A|^{-1/2}) \quad (1.2)$$

where  $E(S_A/|A|) = \frac{\phi r}{1-\phi}$ . By Taylor expansion around the mean:

$$\begin{aligned} (S_A/|A|) \log\left(\frac{S_A/|A|}{r + S_A/|A|}\right) &= \frac{\phi r}{1-\phi} \log\left(\frac{\phi}{1-\phi}\right) \\ &\quad + (1-\phi + \log \phi) \left(S_A/|A| - \frac{\phi r}{1-\phi}\right) \\ &\quad + \frac{1}{2} \left(\frac{(1-\phi)^2}{\phi r} - \frac{(1-\phi)^2}{r}\right) \left(S_A/|A| - \frac{\phi r}{1-\phi}\right)^2 \\ &\quad + o_p(|A|^{-1}) \end{aligned}$$

$$\begin{aligned} \log\left(\frac{r}{r + S_A/|A|}\right) &= \log(1-\phi) - \frac{1-\phi}{r} \left(S_A/|A| - \frac{\phi r}{1-\phi}\right) \\ &\quad + \frac{(1-\phi)^2}{2r^2} \left(S_A/|A| - \frac{\phi r}{1-\phi}\right)^2 + o_p(|A|^{-1}). \end{aligned}$$

So we have the last term in 1.1 as:

$$\begin{aligned} S_A \log\left(\frac{S_A/|A|}{r + S_A/|A|}\right) + r|A| \log\left(\frac{r}{r + S_A/|A|}\right) \\ &= |A|(S_A/|A|) \log\left(\frac{S_A/|A|}{r + S_A/|A|}\right) + r|A| \log\left(\frac{r}{r + S_A/|A|}\right) \\ &= \frac{1}{2} \frac{(1-\phi)^2}{\phi r} \frac{S_A^2}{|A|} + c_1 S_A + c_2 |A| + o_p(1) \end{aligned}$$

Where  $c_1$  and  $c_2$  are some constants. Similarly we do the same to other terms in 1.1. By the fact that  $S_A = S_{A_1} + S_{A_2} + S_R$  and  $|A| = |A_{0,1}| + |A_{1,2}| + |R|$ , all the first order terms of  $S_A$ ,  $S_{A_1}$ ,  $S_{A_2}$ ,  $S_R$ ,  $|A|$ ,  $|A_{0,1}|$ ,  $|A_{1,2}|$  and  $|R|$  are cancelled.

Because  $m/n$  holds constant,  $\frac{|A_{0,1}|}{|A|}$ ,  $\frac{|A_{1,2}|}{|A|}$  and  $\frac{|R|}{|A|}$  also hold constant. We have under the null hypothesis:

$$\frac{2\phi r}{(1-\phi)^2} GLR_{NB,m} = \frac{S_{A_1}^2}{|A_{0,1}|} + \frac{S_{A_2}^2}{|A_{1,2}|} + \frac{S_R^2}{|R|} - \frac{S_A^2}{|A|} + o_p(1) \quad (1.3)$$

$$GLR_{NB,m} = Z_m + o_p(1) \quad (1.4)$$

Notice that  $\frac{\phi r}{(1-\phi)^2}$  is the variance of negative binomial distribution. So under null hypothesis, if we have all the elements scaled by the common  $\sigma_0$  they have

variance equals to 1.

Last, if we assume read counts are Poisson random variables with blockwise constant parameter  $\lambda$ , the GLR test statistics is:

$$GLR_{P,m} = S_{A_1} \log \frac{S_{A_1}}{|A_{0,1}|} + S_{A_2} \log \frac{S_{A_2}}{|A_{1,2}|} + S_R \log \frac{S_R}{|R|} - S_A \log \frac{S_A}{|A|}$$

By exactly similar arguments we have under null hypothesis:

$$2\lambda GLR_{P,m} = \frac{S_{A_1}^2}{|A_{0,1}|} + \frac{S_{A_2}^2}{|A_{1,2}|} + \frac{S_R^2}{|R|} - \frac{S_A^2}{|A|} + o_p(1) \quad (1.5)$$

$$GLR_{P,m} = Z_m + o_p(1) \quad (1.6)$$

Therefore, The GLR statistics  $GLR_{G,m}, GLR_{P,m}, GLR_{NB,m}$  are asymptotically equivalent to  $Z_m$ .  $\square$

**Theorem 2.**

Consider a Gaussian random field  $G(s, t)$  defined on the upper triangular part of a unit square,  $B = \{(s, t) | 0 \leq s \leq t \leq 1\}$ . The random field  $G(s, t)$  satisfies the following properties: (1) for  $s, t \in (0, 1)$  and  $s < t$ ,  $\partial^2 G(s, t) / \partial s \partial t$  are normally distributed as  $N(0, dt ds)$ ; (2) for  $t \in (0, 1)$ ,  $\partial^2 G(t, t) / \partial t^2$  are normally distributed as  $N(0, \frac{1}{2}(dt)^2)$ ; (3) for regions  $B_i \subset B$ ,  $i = 1, 2$ ,  $\text{Cov}(G(B_1), G(B_2)) = |B_1 \cap B_2|$ . For region  $\tilde{B} \subset B$ , we define the integral

$$G_{\tilde{B}} = \int \int_{(s,t) \in \tilde{B}} G(s, t) ds dt$$

It is obvious that, as  $n \rightarrow \infty$ ,

$$\frac{|A_1|}{n^2} \rightarrow \frac{1}{2}t^2, \quad \frac{|A_1|}{|A_1 \cup R_t|} \rightarrow \frac{t}{2-t}, \quad \frac{|A_1 \cup R_t|}{|A|} \rightarrow t(2-t).$$

Then by Donsker's theorem:

$$\frac{S_{A_1}}{\sqrt{n^2/2}} \rightarrow G_{\tilde{A}_1}, \quad \frac{S_{A_1 \cup R_t}}{\sqrt{n^2/2}} \rightarrow G_{\tilde{A}_1 \cup \tilde{R}_t}, \quad \frac{S_A}{\sqrt{n^2/2}} \rightarrow G_{\tilde{A}}.$$

Hence,

$$Z_m \rightarrow g_t, \quad \tilde{Z} \rightarrow g_\delta.$$

for  $m_0/n \rightarrow \delta > 0$ .  $\square$

## 2 The simulated distribution of $\tilde{Z}$

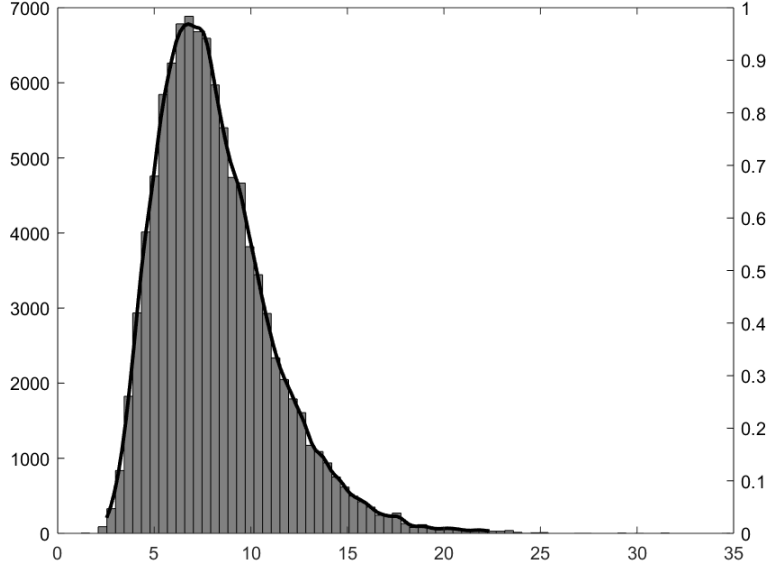

**Fig. S1.** Histogram and density function of simulated  $\tilde{Z}$  with  $n = 10^5$  and  $m_0 = n \cdot 2.5\%$ .

## 3 Theoretical and practical time complexity

In the best case, we have  $r = \log_2 n$  iterations. The time complexity is as follows:

$$\begin{aligned} & (2 \times \frac{n^2 + n}{2} + 4n) + (2^2 \times \frac{(n/2)^2 + n/2}{2} + 4n) + \dots + (2^r \times \frac{(n/2^{r-1})^2 + n/2^{r-1}}{2} + 4n) \\ & = n^2(1 + \frac{1}{2} + \frac{1}{4} + \dots) + 5nr = O(n^2) \end{aligned}$$

In the worst case, one of the two sub-matrices we divide is as small as possible with size  $\xi$  in each iteration. We have  $r = n/\xi$  iterations.

$$\begin{aligned} & (2 \times \frac{n^2 + n}{2} + 4n) + (2 \times \frac{(n - \xi)^2 + (n - \xi)}{2} + 4(n - \xi)) + \dots + (2 \times \frac{(2\xi)^2 + 2\xi}{2} + 4 \times 2\xi) \\ & = (n^2 + (n - \xi)^2 + \dots + (2\xi)^2) + 5(n + (n - \xi) + \dots + 2\xi) = O(n^3) \end{aligned}$$

We also tested HiCKey on Chr1 matrices from GM12878 cell line. The following figure shows the real performance of running time and memory usage.

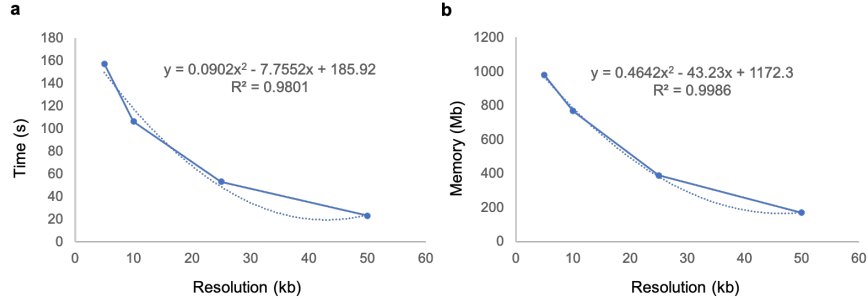

**Fig. S2. The practical running time and memory usage. (A)** Running time and resolution. **(B)** Memory and resolution. Both of the polynomial functions were calculated by Excel.

## 4 Performance of HiCKey and other methods in simulation datasets Sim1 and Sim2

**Table S1.** Performance of change-point estimation in Sim1 at different noise levels. The numbers in each cell show the mean and standard error.

|           |               | 4%             | 8%             | 12%            | 16%            |
|-----------|---------------|----------------|----------------|----------------|----------------|
| HiCKey    | $\hat{K} - K$ | -0.2 (0.20)    | 1.8 (0.37)     | 19.4 (3.22)    | 82.6 (2.11)    |
|           | TPR           | .9988 (.0012)  | .9930 (.0022)  | .9812 (.0039)  | .9459 (.0087)  |
|           | FDR           | .0000 (.0000)  | .0173 (.0031)  | .1176 (.0163)  | .3618 (.0086)  |
| IC-Finder | $\hat{K} - K$ | 207.4 (10.78)  | 113.8 (4.68)   | 98.6 (4.13)    | 104.0 (2.21)   |
|           | TPR           | .5593 (.0150)  | .8430 (.0206)  | .8779 (.0110)  | .8930 (.0047)  |
|           | FDR           | .7441 (.0148)  | .4902 (.0163)  | .4395 (.0090)  | .4412 (.0069)  |
| HiCSeg    | $\hat{K} - K$ | -2.2 (0.37)    | -29.2 (4.54)   | -99.2 (9.57)   | -150.2 (1.46)  |
|           | TPR           | .9872 (.0022)  | .8290 (.0256)  | .4232 (.0557)  | .1244 (.0087)  |
|           | FDR           | .0000 (.0000)  | .0013 (.0013)  | .0000 (.0000)  | .0182 (.0182)  |
| TADTree   | $\hat{K} - K$ | 397.6 (35.33)  | 230 (28.55)    | 145.8 (27.83)  | 67.4 (15.49)   |
|           | TPR           | .7791 (.0144)  | .7826 (.0193)  | .8035 (.0317)  | .8465 (.0113)  |
|           | FDR           | .8227 (.0156)  | .7347 (.0258)  | .6559 (.0321)  | .5311 (.0306)  |
| 3DNetMod  | $\hat{K} - K$ | 519.40 (39.50) | 558.80 (42.92) | 424.60 (31.89) | 349.00 (13.78) |
|           | TPR           | .9205 (.0156)  | .9345 (.0130)  | .8947 (.0188)  | .8491 (.0093)  |
|           | FDR           | .7695 (.0111)  | .7788 (.0097)  | .7413 (.0088)  | .7200 (.0075)  |

**Table S2.** Performance of change-point estimation in Sim2 at different noise levels. The numbers in each cell show the mean and standard error.

|           |     | 4%            | 8%            | 12%           | 16%           |
|-----------|-----|---------------|---------------|---------------|---------------|
| HiCKey    | TPR | .8450 (.0070) | .7570 (.0090) | .6568 (.0044) | .5289 (.0118) |
|           | FDR | .0590 (.0050) | .0867 (.0058) | .1343 (.0043) | .1928 (.0066) |
| IC-Finder | TPR | .5508 (.0075) | .7010 (.0082) | .6858 (.0172) | .6533 (.0117) |
|           | FDR | .5934 (.0119) | .3111 (.0093) | .2674 (.0156) | .2860 (.0192) |
| HiCSeg    | TPR | .5071 (.0089) | .0990 (.0016) | .0350 (.0009) | .0258 (.0015) |
|           | FDR | .0000 (.0000) | .0144 (.0094) | .0268 (.0165) | .0400 (.0400) |
| TADTree   | TPR | .6990 (.0074) | .7071 (.0097) | .6756 (.0099) | .5467 (.0497) |
|           | FDR | .5334 (.0166) | .4938 (.0110) | .4494 (.0169) | .4268 (.0176) |
| 3DNetMod  | TPR | .6015 (.0102) | .4748 (.0165) | .3522 (.0098) | .2738 (.0083) |
|           | FDR | .5879 (.0083) | .5228 (.0062) | .5077 (.0102) | .5701 (.0029) |

## 5 Validating the performance of detecting hierarchical TAD structure in Sim2

**Table S3.** The upper panel is hierarchical similarity of HiCKey TADs and true structure in Sim2. The Fowlkes-Mallows indices ( $B_k$ ) were calculated for four noise levels. The numbers in each cell show the mean and standard error.

The lower panel is mean and standard deviation of  $B_k$  between the true structure and unrelated randomly relabeled nodes (Relabeling).

| Method     | $B_k$ | 4%            | 8%            | 12%           | 16%           |
|------------|-------|---------------|---------------|---------------|---------------|
| HiCKey     | $B_1$ | .9242 (.0025) | .8676 (.0056) | .7784 (.0044) | .6887 (.0053) |
|            | $B_2$ | .9051 (.0071) | .8852 (.0045) | .8647 (.0103) | .8403 (.0063) |
|            | $B_3$ | .8196 (.0066) | .8168 (.0089) | .8148 (.0062) | .7702 (.0076) |
| Relabeling | $B_1$ | .0030 (.0003) | .0031 (.0003) | .0034 (.0003) | .0040 (.0003) |
|            | $B_2$ | .0039 (.0003) | .0040 (.0003) | .0045 (.0003) | .0053 (.0003) |
|            | $B_3$ | .0051 (.0003) | .0054 (.0003) | .0058 (.0003) | .0072 (.0004) |

## 6 Robustness of HiCKey against different distributions of HiC data

**Table S4.** Robustness against different distributions. The numbers in each cell show the mean and standard error.

| Setting | Noise | $\hat{K} - K$ | TPR         | FDR         |
|---------|-------|---------------|-------------|-------------|
| Sim3    | 0%    | 0.15(0.02)    | 1(0)        | .0046(4e-4) |
|         | 5%    | 0.13(0.01)    | 1(0)        | .0041(4e-4) |
|         | 10%   | 0.15(0.01)    | 1(0)        | .0047(4e-4) |
|         | 15%   | 0.13(0.01)    | .9998(9e-5) | .0043(4e-4) |
| Sim4    | 0%    | 0.14(0.01)    | .9999(7e-5) | .0045(4e-4) |
|         | 5%    | 0.16(0.01)    | .9998(9e-5) | .0050(4e-4) |
|         | 10%   | 0.15(0.01)    | .9998(7e-5) | .0048(4e-4) |
|         | 15%   | 0.14(0.01)    | .9998(7e-5) | .0055(4e-4) |

## 7 Robustness of HiCKey against decision in the first iteration

**Table S5.** Robustness against the first iteration in Sim1. The numbers in each cell show the mean and standard error.

|               | 4%           | 8%           | 12%          | 16%           |
|---------------|--------------|--------------|--------------|---------------|
| $\hat{K} - K$ | 0.06(0.0095) | 0.02(0.0101) | 0.72(0.0328) | -1.05(0.0421) |
| TPR           | .9977(.0001) | .9846(.0002) | .9761(.0004) | .9745(.0003)  |

**Table S6.** Robustness against the first iteration in Sim2. The numbers in each cell show the mean and standard error.

|               | 4%           | 8%           | 12%           | 16%           |
|---------------|--------------|--------------|---------------|---------------|
| $\hat{K} - K$ | 0.58(0.0272) | 0.27(0.0300) | -0.93(0.0607) | -0.87(0.0866) |
| TPR           | .9950(.0001) | .9804(.0002) | .93825(.0005) | .9073(.0010)  |

**Table S7.** Robustness against the first iteration in hESC. The numbers in each cell show the mean and standard error.

| Chr   | $\hat{K} - K$ | TPR        |
|-------|---------------|------------|
| chr1  | 0.42(0.0525)  | .96(.0003) |
| chr2  | 0.74(0.0664)  | .94(.0013) |
| chr3  | -0.66(0.0474) | .96(.0006) |
| chr4  | -0.68(0.0595) | .94(.0006) |
| chr5  | 1.21(0.0465)  | .96(.0006) |
| chr6  | 1.91(0.0794)  | .94(.0012) |
| chr7  | -1.35(0.0478) | .96(.0006) |
| chr8  | -0.24(0.0351) | .96(.0009) |
| chr9  | -0.85(0.0648) | .97(.0006) |
| chr10 | 1.33(0.0632)  | .95(.0009) |
| chr11 | 0.06(0.0367)  | .95(.0009) |
| chr12 | -0.38(0.0560) | .95(.0006) |
| chr13 | 0.14(0.0569)  | .93(.0012) |
| chr14 | 0.13(0.0465)  | .95(.0009) |
| chr15 | 1.65(0.0402)  | .95(.0009) |
| chr16 | -0.08(0.0345) | .97(.0006) |
| chr17 | 0.10(0.0323)  | .95(.0006) |
| chr18 | -0.53(0.0373) | .93(.0012) |
| chr19 | 0.21(0.0402)  | .90(.0009) |
| chr20 | 0.02(0.0259)  | .94(.0009) |
| chr21 | -0.26(0.0351) | .92(.0019) |
| chr22 | -0.22(0.0332) | .95(.0012) |
| chr23 | -1.52(0.0876) | .94(.0012) |



**Table S8.** Robustness against the first iteration in IMR90. The numbers in each cell show the mean and standard error.

| chr   | $\hat{K} - K$  | TPR        |
|-------|----------------|------------|
| chr1  | 0.39(0.0519)   | .97(.0003) |
| chr2  | 0.16(0.0531)   | .95(.0006) |
| chr3  | -1.44(0.0515)  | .95(.0006) |
| chr4  | -0.28(0.0572)  | .95(.0006) |
| chr5  | 0.68(0.0557)   | .96(.0006) |
| chr6  | -2.09(0.0515)  | .94(.0009) |
| chr7  | -0.72(0.0351)  | .97(.0003) |
| chr8  | 0.51(0.0376)   | .96(.0006) |
| chr9  | -0.49(0.0379)  | .96(.0006) |
| chr10 | -0.25(0.03826) | .96(.0006) |
| chr11 | 0.01(0.0386)   | .97(.0006) |
| chr12 | 0.30(0.0402)   | .96(.0006) |
| chr13 | 1.26(0.0468)   | .93(.0013) |
| chr14 | 1.45(0.0424)   | .94(.0012) |
| chr15 | -0.37(0.0427)  | .97(.0006) |
| chr16 | -0.07(0.0503)  | .96(.0006) |
| chr17 | -2.50(0.0458)  | .93(.0012) |
| chr18 | -0.04(0.0326)  | .96(.0006) |
| chr19 | -0.33(0.0335)  | .92(.0012) |
| chr20 | -0.36(0.0300)  | .94(.0009) |
| chr21 | -0.18(0.0294)  | .91(.0016) |
| chr22 | -0.90(0.0490)  | .94(.0012) |
| chr23 | -0.19(0.0538)  | .96(.0006) |

## 8 The statistical result of hierarchical orders in 7 cell lines

**Table S9.** TAD number and percentage in each hierarchical layer.

| Cell line | #TADs | order 1       | order 2      | order 3     | $\geq$ order 4 |
|-----------|-------|---------------|--------------|-------------|----------------|
| GM12878   | 8586  | 7743 (90.18%) | 687 (8.00%)  | 96 (1.12%)  | 14 (0.16%)     |
| HMEC      | 8200  | 7072 (86.24%) | 869 (10.60%) | 183 (2.23%) | 31 (0.38%)     |
| HUVEC     | 8903  | 8053 (90.45%) | 690 (7.75%)  | 98 (1.10%)  | 16 (0.18%)     |
| IMR90     | 9043  | 8202 (90.70%) | 689 (7.62%)  | 94 (1.04%)  | 12 (0.13%)     |
| K562      | 8801  | 8046 (91.42%) | 618 (7.02%)  | 87 (0.99%)  | 4 (0.05%)      |
| KBM7      | 6246  | 5402 (86.49%) | 647 (10.36%) | 131 (2.10%) | 21 (0.34%)     |
| NHEK      | 7726  | 6935 (89.76%) | 652 (8.44%)  | 87 (1.13%)  | 6 (0.08%)      |

## 9 TAD boundary enrichment in active chromosomal regions of 6 cell lines

**Table S10.** Number of bins and HiCKey boundaries in active and repressive regions. The enrichment of TAD boundaries is calculated by one-sided Fisher’s exact test ( $p$ -value).

| Cell Line | State      | Bins  | Boundaries | $p$ -value |
|-----------|------------|-------|------------|------------|
| GM12878   | active     | 29293 | 2490       | 5.15e-18   |
|           | repressive | 81220 | 5553       |            |
| HESC      | active     | 55345 | 4540       | 7.92e-4    |
|           | repressive | 13010 | 950        |            |
| HUVEC     | active     | 54380 | 4420       | 4.48e-12   |
|           | repressive | 53832 | 3739       |            |
| IMR90     | active     | 64220 | 5494       | 2.98e-58   |
|           | repressive | 46400 | 2706       |            |
| K562      | active     | 20960 | 1781       | 3.50e-9    |
|           | repressive | 89932 | 6488       |            |
| KBM7      | active     | 34269 | 2090       | 4.83e-15   |
|           | repressive | 75936 | 3716       |            |
